# Supplementary material for: Electrochemical detection of mercuric(ii) ions in aqueous media using glassy carbon electrode modified with synthesized tribenzamides and silver nanoparticles
Source: Royal Society of Chemistry journal article supplement (doi:10.1039/d1ra08517d), 2022-01-01
Supplement: d1ra08517d1.pdf [file d1ra08517d1.pdf]

## Supplementary Data

# Electrochemical Detection of Mercuric (II) Ions in Aqueous Media Using Glassy Carbon Electrode Modified With Synthesized Tribenzamides and Silver Nanoparticles

Aalia Manzoor <sup>a</sup>, Tayyaba Kokab <sup>a</sup>, Anam Nawab <sup>a</sup>, Afzal Shah <sup>a, \*</sup>, Humaira Masood Siddiqi <sup>a, \*</sup> and Asma Iqbal <sup>a, b</sup>

<sup>a</sup> Department of Chemistry, Quaid-i-Azam University, Islamabad, 45320, Pakistan

<sup>b</sup> School of Chemistry and Chemical Engineering and State Key Laboratory of Metal Matrix Composites, Shanghai Jiao Tong University, Shanghai, 200240, P. R. China

\* Corresponding author's E. mail addresses: [afzals\\_qau@yahoo.com](mailto:afzals_qau@yahoo.com) (Afzal Shah)  
[humairas@qau.edu.pk](mailto:humairas@qau.edu.pk) (Humaira Masood Siddiqi)

## <sup>1</sup>H NMR spectrum of BODA

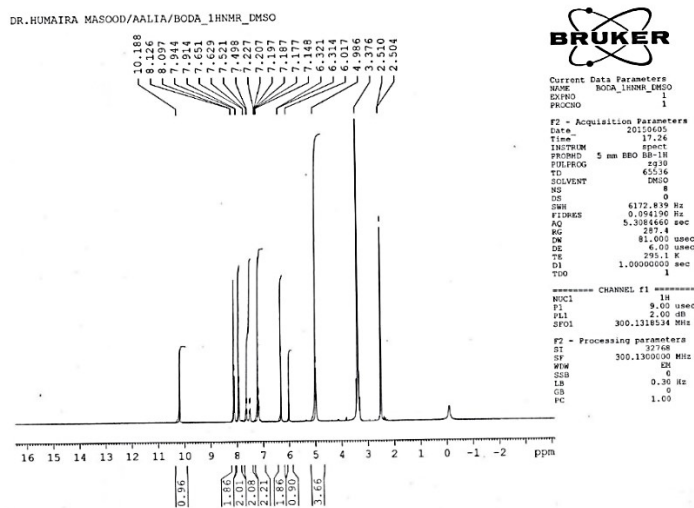

Figure 1: <sup>1</sup>H NMR spectrum of BODA



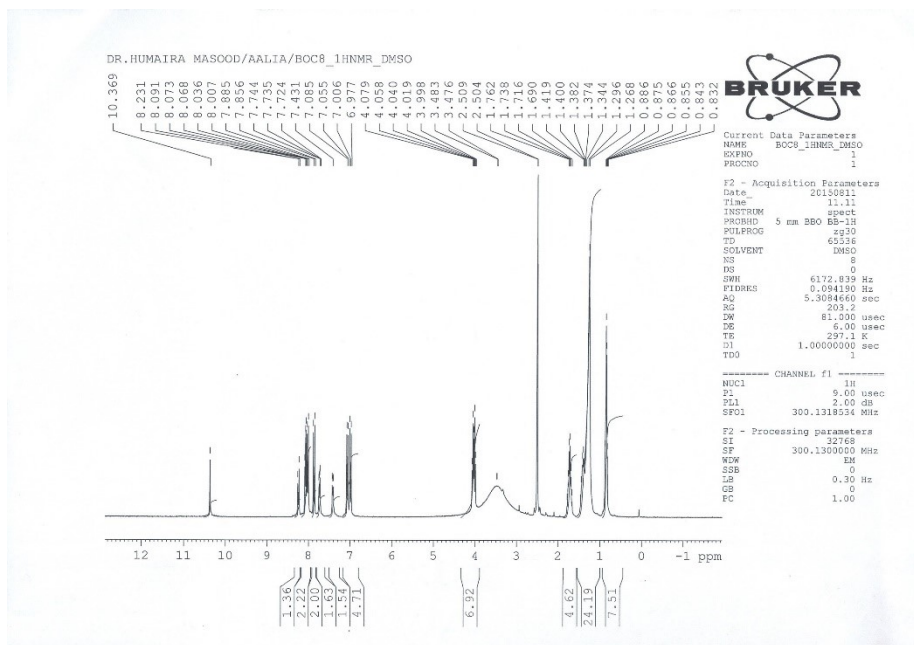

Figure 3: <sup>1</sup>H NMR spectrum of TBA

<sup>13</sup>C NMR spectrum of TBA

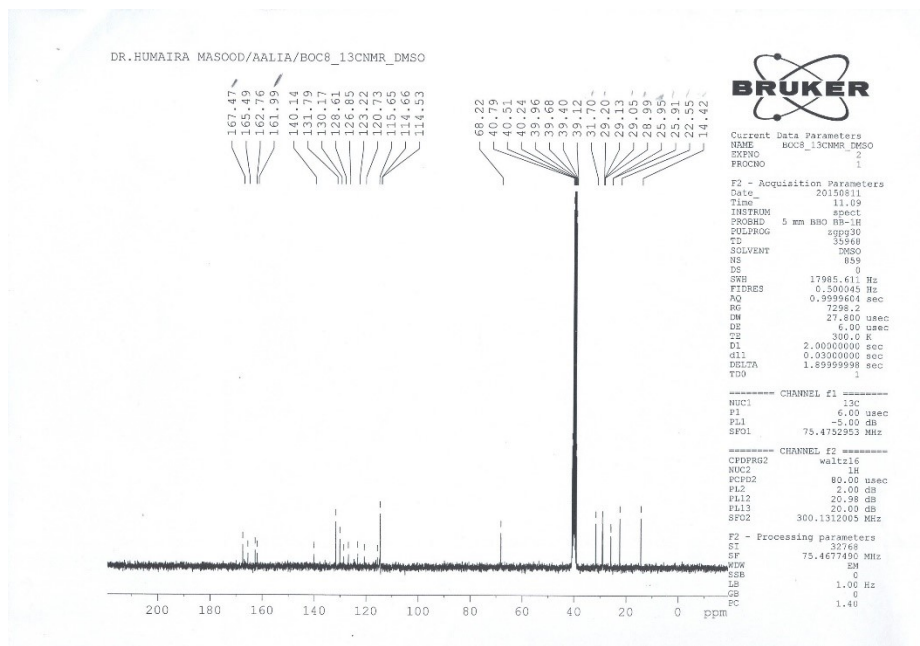

Figure 4: <sup>13</sup>C NMR spectrum of TBA

<sup>1</sup>H NMR spectrum of TBb

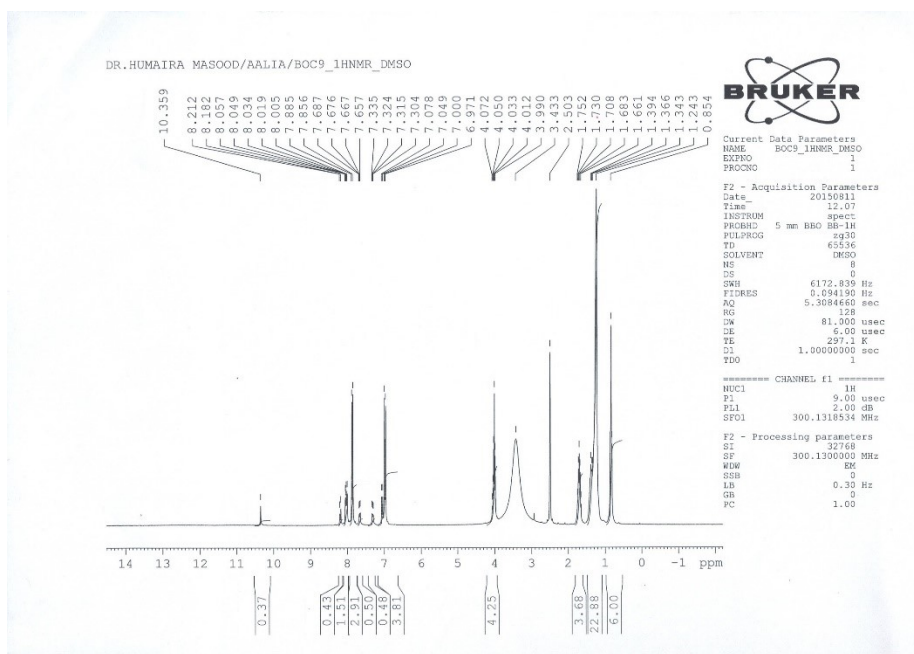

Figure 5: <sup>1</sup>H NMR spectrum of TBb

<sup>13</sup>C NMR spectrum of TBb

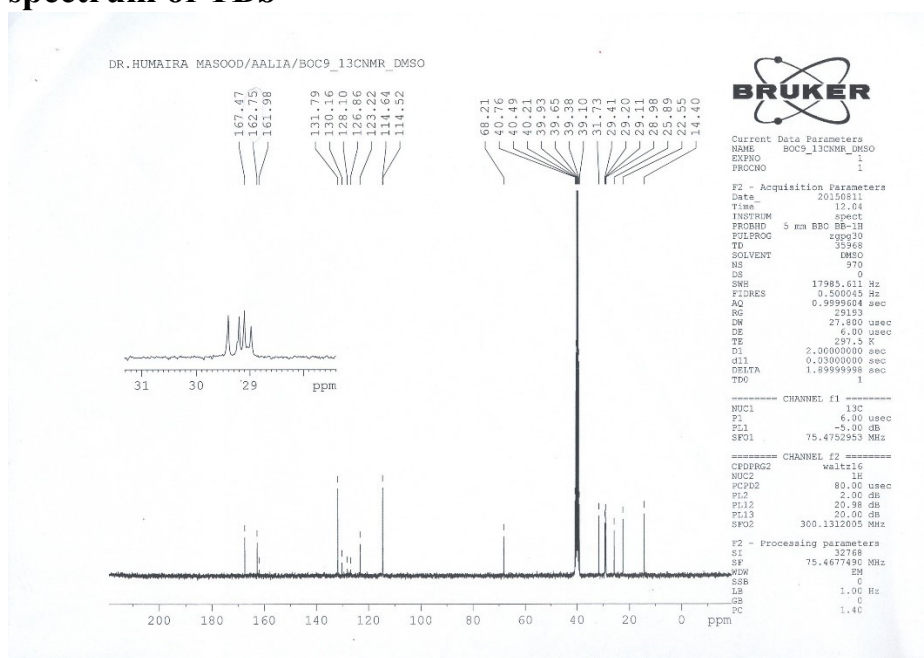

Figure 6: <sup>13</sup>C NMR spectrum of TBb

<sup>1</sup>H NMR spectrum of TBc

DR.HUMAIRA MASOOD/AALIA/COCL2\_1HNMR\_DMSO

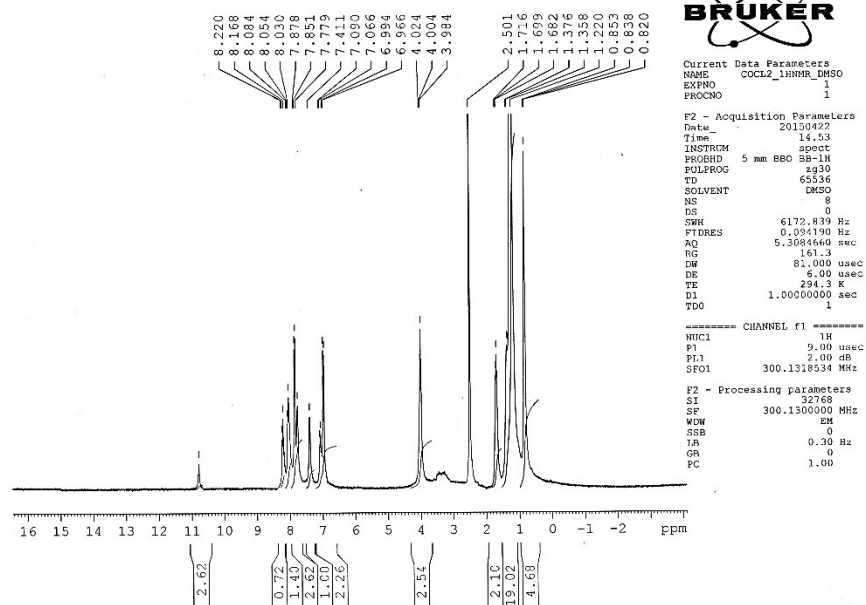

Figure 7: <sup>1</sup>H NMR spectrum of TBC

### <sup>13</sup>C NMR spectrum of TBC

DR.HUMAIRA MASOOD/AALIA/BOC12\_13CNMR\_DMSO

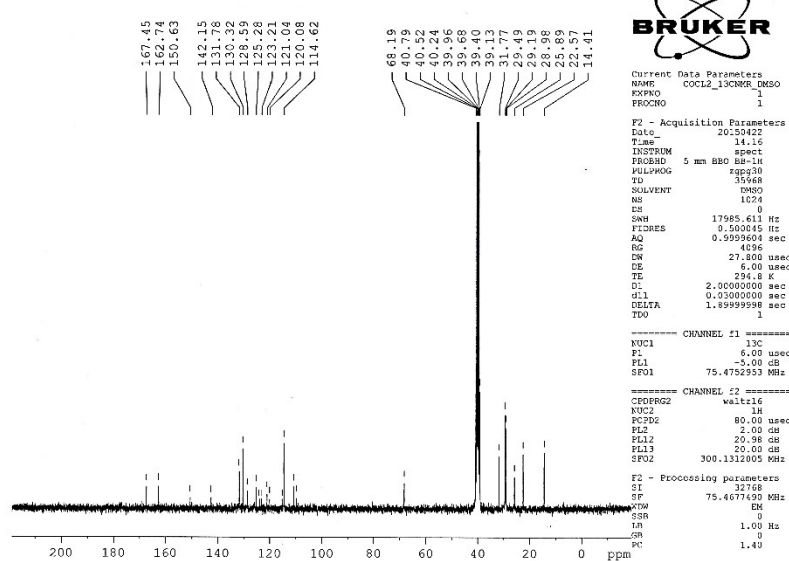

Figure 8: <sup>13</sup>C NMR spectrum of TBC
